# Supplementary material
Source: MDPI journal article supplement (https://www.mdpi.com/search?q=catalysts-08-00283)
Supplement: s001 [file catalysts-08-00283-s001.pdf]

# Supplementary Material: Effect of Y Modified Ceria Support in Mono and Bimetallic Pd–Au Catalysts for Complete Benzene Oxidation

Lyuba Ilieva<sup>1</sup>, Anna Maria Venezia<sup>2,\*</sup>, Petya Petrova<sup>1</sup>, Giuseppe Pantaleo<sup>2</sup>, Leonarda F. Liotta<sup>2</sup>, Rodolfo Zanella<sup>3</sup>, Zbigniew Kaszkur<sup>4</sup> and Tatyana Tabakova<sup>1,\*</sup>

<sup>1</sup> Institute of Catalysis, Bulgarian Academy of Sciences, 1113 Sofia, Bulgaria; luilieva@ic.bas.bg (L.I.); inj\_petrova@abv.bg (P.P.)

<sup>2</sup> Istituto per lo Studio dei Materiali Nanostrutturati, CNR, 90146 Palermo, Italy; pantaleo@pa.ismn.cnr.it (G.P.); leonarda.liotta@ismn.cnr.it (L.F.L.)

<sup>3</sup> Instituto de Ciencias Aplicadas y Tecnología, Universidad Nacional Autónoma de México, Circuito Exterior S/N, Ciudad Universitaria, C.P. 04510 Mexico City, Mexico; rodolfo.zanella@ccadet.unam.mx

<sup>4</sup> Institute of Physical Chemistry, Polish Academy of Sciences, 01-224 Warsaw, Poland; zkaszku@ichf.edu.pl

\* Correspondence: annamaria.venezia@cnr.it (A.M.V.); tabakova@ic.bas.bg (T.T.)

Received: 21 June 2018; Accepted: 11 July 2018; Published: date

## Figures

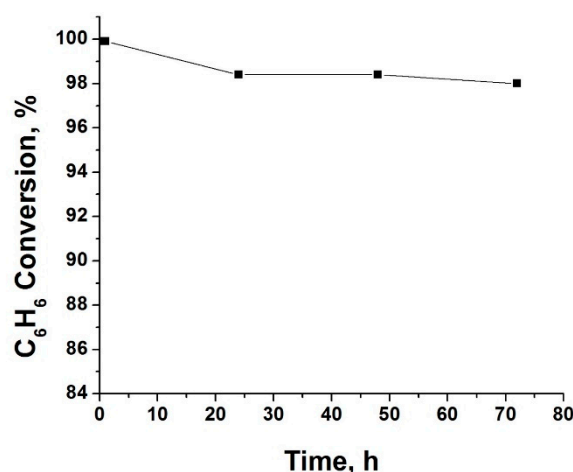

Figure S1. Stability test of Pd–AuYCeIM catalyst performed for 72 h at 150 °C.

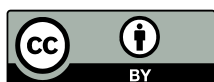

© 2018 by the authors. Submitted for possible open access publication under the terms and conditions of the Creative Commons Attribution (CC BY) license (<http://creativecommons.org/licenses/by/4.0/>).
